# Supplementary material
Source: ML conference proceedings conference paper supplement (https://proceedings.mlr.press/v80/zhang18e.html)
Supplement: Supplementary file 1 [file zhang18e-supp.zip]

---

# Supplemental Material: Safe Element Screening for Submodular Function Minimization

---

Weizhong Zhang<sup>1</sup> Bin Hong<sup>2</sup> Lin Ma<sup>1</sup> Wei Liu<sup>1</sup> Tong Zhang<sup>1</sup>

<sup>1</sup> Tencent AI Lab, Shenzhen, China

<sup>2</sup>State Key Lab of CAD&CG, Zhejiang University, China

In this supplement, we present the detailed proofs of all the theorems in the main text.

## A. Proof of Theorem 1

*Proof.* of Theorem 1:

(i) Since  $f(\mathbf{w}) = \max_{\mathbf{s} \in B(F)} \langle \mathbf{w}, \mathbf{s} \rangle$ , we can have

$$\min_{\mathbf{w} \in \mathbb{R}^p} f(\mathbf{w}) + \sum_{j=1}^p \psi_j([\mathbf{w}]_j) \quad (8)$$

$$= \min_{\mathbf{w} \in \mathbb{R}^p} \max_{\mathbf{s} \in B(F)} \langle \mathbf{w}, \mathbf{s} \rangle + \sum_{j=1}^p \psi_j([\mathbf{w}]_j)$$

$$= \max_{\mathbf{s} \in B(F)} \min_{\mathbf{w} \in \mathbb{R}^p} \langle \mathbf{w}, \mathbf{s} \rangle + \sum_{j=1}^p \psi_j([\mathbf{w}]_j) \quad (9)$$

$$= \max_{\mathbf{s} \in B(F)} - \sum_{j=1}^p \psi_j^*(-[\mathbf{s}]_j), \quad (10)$$

where (9) holds due to the strong duality theorem (Borwein & Lewis, 2010), and (10) holds due to the definitions of the Fenchel conjugate of  $\psi_j$ .

(ii) From (8), we have

$$\begin{aligned} \mathbf{s}^* &\in \arg \max_{\mathbf{s} \in B(F)} \langle \mathbf{w}^*, \mathbf{s} \rangle \\ &\Leftrightarrow \langle \mathbf{w}^*, \mathbf{s}^* \rangle \geq \langle \mathbf{w}^*, \mathbf{s} \rangle, \forall \mathbf{s} \in B(F) \\ &\Leftrightarrow \mathbf{w}^* \in N_{B(F)}(\mathbf{s}^*). \end{aligned}$$

From Eq. (10), we have

$$\begin{aligned} \mathbf{w}^* &\in \arg \min_{\mathbf{w} \in \mathbb{R}^p} \langle \mathbf{w}, \mathbf{s}^* \rangle + \sum_{j=1}^p \psi_j([\mathbf{w}]_j) \\ &\Leftrightarrow [\mathbf{s}]_k^* \in -\partial \psi_k([\mathbf{w}]_k^*), \forall k \in V. \end{aligned}$$

The proof is complete. □

## B. Proof of Lemma 1

*Proof.* of Lemma 1:

(i) It is the immediate conclusion of Theorem 2.

(ii) Since  $\hat{\mathcal{E}} \subseteq A^*$  and  $\hat{\mathcal{G}} \subseteq V/A^*$ , we can solve the problem **SFM** by fixing the set  $\hat{\mathcal{E}}$  and optimizing over  $V/(\hat{\mathcal{E}} \cup \hat{\mathcal{G}})$ . And the objective function becomes  $\hat{F}(C) := F(\hat{\mathcal{E}} \cup C) - F(\hat{\mathcal{E}})$  with  $C \subseteq V/(\hat{\mathcal{E}} \cup \hat{\mathcal{G}})$ . Thus, **SFM** can be deduced to

$$\min_{C \subseteq V/(\hat{\mathcal{E}} \cup \hat{\mathcal{G}})} \hat{F}(C) := F(\hat{\mathcal{E}} \cup C) - F(\hat{\mathcal{E}}).$$

The second term of the new objective function  $\hat{F}(C)$  is added to make  $\hat{F}(\emptyset) = 0$ , which is essential in submodular function analysis, such as Lovász extension, submodular and base polyhedra.

Below, we argue that  $\hat{F}(C)$  is a submodular function.

For all  $S \subseteq V/(\hat{\mathcal{E}} \cup \hat{\mathcal{G}})$  and  $T \subseteq V/(\hat{\mathcal{E}} \cup \hat{\mathcal{G}})$ , we have

$$\begin{aligned}
 \hat{F}(S) + \hat{F}(T) &= (F(\hat{\mathcal{E}} \cup S) - F(\hat{\mathcal{E}})) + (F(\hat{\mathcal{E}} \cup T) - F(\hat{\mathcal{E}})) \\
 &= F(\hat{\mathcal{E}} \cup S) + F(\hat{\mathcal{E}} \cup T) - 2F(\hat{\mathcal{E}}) \\
 &\geq F((\hat{\mathcal{E}} \cup S) \cup (\hat{\mathcal{E}} \cup T)) + F((\hat{\mathcal{E}} \cup S) \cap (\hat{\mathcal{E}} \cup T)) - 2F(\hat{\mathcal{E}}) \\
 &= F(\hat{\mathcal{E}} \cup (S \cup T)) + F(\hat{\mathcal{E}} \cup (S \cap T)) - 2F(\hat{\mathcal{E}}) \\
 &= (F(\hat{\mathcal{E}} \cup (S \cup T)) - F(\hat{\mathcal{E}})) + (F(\hat{\mathcal{E}} \cup (S \cap T)) - F(\hat{\mathcal{E}})) \\
 &= \hat{F}(S \cup T) + \hat{F}(S \cap T).
 \end{aligned} \tag{11}$$

The inequality (11) comes from the submodularity of  $F$ .

(iii) It is the immediate conclusion of (ii).

The proof is complete.  $\square$

### C. Proof of Theorem 3

To prove Theorem 3, we need the following Lemma.

**Lemma 4.** [Dual of minimization of submodular functions, Proposition 10.3 in (Bach et al., 2013)] *Let  $F$  be a submodular function such that  $F(\emptyset) = 0$ . We have:*

$$\min_{A \subseteq V} F(A) = \max_{\mathbf{s} \in B(F)} \mathbf{s}_-(V) = \frac{1}{2} \left( F(V) - \min_{\mathbf{s} \in B(F)} \|\mathbf{s}\|_1 \right), \tag{12}$$

where  $[\mathbf{s}_-]_k = \min\{[\mathbf{s}]_k, 0\}$  for  $\forall k \in V$ .

We now turn to prove Theorem 3.

*Proof.* of Theorem 3:

Since  $\hat{P}(\hat{\mathbf{w}})$  is 1-strongly convex, for any  $\hat{\mathbf{w}} \in \text{dom} \hat{P}(\hat{\mathbf{w}})$  and  $\hat{\mathbf{w}}^* = \arg \min_{\hat{\mathbf{w}} \in \mathbb{R}^{\hat{p}}} \hat{P}(\hat{\mathbf{w}})$ , we can have

$$\hat{P}(\hat{\mathbf{w}}) \geq \hat{P}(\hat{\mathbf{w}}^*) + \langle \hat{\mathbf{g}}, \hat{\mathbf{w}} - \hat{\mathbf{w}}^* \rangle + \frac{1}{2} \|\hat{\mathbf{w}} - \hat{\mathbf{w}}^*\|_2^2,$$

where  $\hat{\mathbf{g}} \in \partial \hat{P}(\hat{\mathbf{w}}^*)$ .

Since  $\text{dom} \hat{P}(\hat{\mathbf{w}}) = \mathbb{R}^{\hat{p}}$ , it holds that  $0 \in \partial \hat{P}(\hat{\mathbf{w}}^*)$ . Hence, we can obtain

$$\frac{1}{2} \|\hat{\mathbf{w}} - \hat{\mathbf{w}}^*\|_2^2 \leq \hat{P}(\hat{\mathbf{w}}) - \hat{P}(\hat{\mathbf{w}}^*).$$

In addition, we notice that  $\hat{P}(\hat{\mathbf{w}}^*) \geq \hat{D}(\hat{\mathbf{s}})$  for all  $\hat{\mathbf{s}} \in B(\hat{F})$ . By substituting this inequality into the above inequality, we obtain that

$$\frac{1}{2} \|\hat{\mathbf{w}} - \hat{\mathbf{w}}^*\|_2^2 \leq \hat{P}(\hat{\mathbf{w}}) - \hat{P}(\hat{\mathbf{w}}^*) \leq \hat{P}(\hat{\mathbf{w}}) - \hat{D}(\hat{\mathbf{s}}) = G(\hat{\mathbf{w}}, \hat{\mathbf{s}}).$$

Thus,

$$\hat{\mathbf{w}}^* \in \mathcal{B} := \left\{ \mathbf{w} : \|\mathbf{w} - \hat{\mathbf{w}}\| \leq \sqrt{2G(\hat{\mathbf{w}}, \hat{\mathbf{s}})} \right\}. \tag{13}$$

According to the equation (Opt) in Theorem 1, we have that  $-\hat{\mathbf{w}}^*$  is the optimal solution of the problem Q-D'. Therefore,  $-\hat{\mathbf{w}}^* \in B(\hat{F})$ . From the definition of  $B(\hat{F})$ , we have

$$-\langle \hat{\mathbf{w}}^*, \mathbf{1} \rangle = -\hat{\mathbf{w}}^*(\hat{V}) = \hat{F}(\hat{V}).$$

Thus,

$$\hat{\mathbf{w}}^* \in \mathcal{P} := \left\{ \mathbf{w} : \langle \mathbf{w}, \mathbf{1} \rangle = -\hat{F}(\hat{V}) \right\}. \quad (14)$$

By section 7.3 of (Bach et al., 2013)), it holds that the unique minimizer of problem Q-D' is also a maximizer of

$$\max_{\mathbf{s} \in B(\hat{F})} \mathbf{s}_-(V).$$

Hence, it holds that

$$\|\hat{\mathbf{s}}^*\|_1 \leq \|\hat{\mathbf{s}}\|_1 \text{ for all } \hat{\mathbf{s}} \in B(\hat{F}). \quad (15)$$

From Lemma 4, we have

$$\begin{aligned} \hat{F}(C) &\geq \frac{1}{2}(\hat{F}(\hat{V}) - \|\hat{\mathbf{s}}\|_1), \text{ for all } \hat{\mathbf{s}} \in B(\hat{F}), \\ \Rightarrow \|\hat{\mathbf{s}}\|_1 &\geq \hat{F}(\hat{V}) - 2\hat{F}(C), \text{ for all } \hat{\mathbf{s}} \in B(\hat{F}). \end{aligned} \quad (16)$$

By combining (15) and (16), we acquire

$$\hat{F}(\hat{V}) - 2\hat{F}(C) \leq \|\hat{\mathbf{s}}^*\|_1 \leq \|\hat{\mathbf{s}}\|_1, \text{ for all } \hat{\mathbf{s}} \in B(\hat{F}).$$

Since  $\hat{\mathbf{w}}^* = -\hat{\mathbf{s}}^*$ , we have

$$\hat{F}(\hat{V}) - 2\hat{F}(C) \leq \|\hat{\mathbf{w}}^*\|_1 \leq \|\hat{\mathbf{s}}\|_1, \text{ for all } \hat{\mathbf{s}} \in B(\hat{F}).$$

Thus, we obtain

$$\hat{\mathbf{w}}^* \in \Omega := \left\{ \mathbf{w} : \hat{F}(\hat{V}) - 2\hat{F}(C) \leq \|\mathbf{w}\|_1 \leq \|\hat{\mathbf{s}}\|_1 \right\}. \quad (17)$$

From (13), (14) and (17), we have  $\hat{\mathbf{w}}^* \in \mathcal{B} \cap \Omega \cap \mathcal{P}$ .

The proof is complete.  $\square$

## D. Proof of Lemma 2

*Proof.* of Lemma 2:

For any  $j = 1, \dots, \hat{p}$ , we have

$$\sum_{i \neq j} ([\mathbf{w}]_i - [\hat{\mathbf{w}}]_i)^2 \leq 2G(\hat{\mathbf{w}}, \hat{\mathbf{s}}) - ([\mathbf{w}]_j - ([\hat{\mathbf{w}}]_j))^2, \quad (18)$$

$$\sum_{i \neq j} [\mathbf{w}]_i = -\hat{F}(\hat{V}) - [\mathbf{w}]_j. \quad (19)$$

By fixing the component  $[\mathbf{w}]_j$ , we can see that (18) and (19) are a ball and a plane in  $\mathbb{R}^{\hat{p}-1}$ , respectively. To make the intersection of (18) and (19) non-empty, we just need to restrict the distance between the center of ball (18) and the plane (19) smaller than the radius, i.e.,

$$\frac{|\sum_{i \neq j} [\hat{\mathbf{w}}]_i + \hat{F}(\hat{V}) + [\mathbf{w}]_j|}{\sqrt{\hat{p}-1}} \leq \sqrt{2G(\hat{\mathbf{w}}, \hat{\mathbf{s}}) - ([\mathbf{w}]_j - [\hat{\mathbf{w}}]_j)^2},$$

which is equivalent to

$$\hat{p}[\mathbf{w}]_j^2 + b[\mathbf{w}]_j + c \leq 0, \quad (20)$$

$$\text{where } b = 2 \left( \sum_{i \neq j} [\hat{\mathbf{w}}]_i + \hat{F}(\hat{V}) - (\hat{p}-1)[\hat{\mathbf{w}}]_j \right), \text{ and } c = \left( \sum_{i \neq j} [\hat{\mathbf{w}}]_i + \hat{F}(\hat{V}) \right)^2 - 2(\hat{p}-1)G(\hat{\mathbf{w}}, \hat{\mathbf{s}}) + (\hat{p}-1)[\hat{\mathbf{w}}]_j^2.$$

Thus we have

$$[\mathbf{w}]_j \in \left[ \frac{-b - \sqrt{b^2 - 4\hat{p}c}}{2\hat{p}}, \frac{-b + \sqrt{b^2 - 4\hat{p}c}}{2\hat{p}} \right]$$

At last, we would point out here that since  $\hat{\mathbf{w}}^*$  must be in the intersection of the ball (18) and the plane (19). Hence, inequality (20) can be satisfied with  $[\hat{\mathbf{w}}^*]_j$ , which implies that  $b^2 - 4\hat{p}c$  would never be negative.

The proof is complete.  $\square$

## E. Proof of Theorem 4

*Proof.* of Theorem 4:

(i): According to  $\min_{\mathbf{w} \in \mathcal{B} \cap \mathcal{P}} [\mathbf{w}]_j = [\mathbf{w}]_j^{\min} > 0$  and  $\hat{\mathbf{w}}^* \in \mathcal{B} \cap \mathcal{P}$ , we have

$$[\hat{\mathbf{w}}^*]_j > 0.$$

From Theorem 2, it holds that  $j \in \arg \min_{C \subseteq \hat{V}} \hat{F}(C) \subseteq A^*$ .

(ii): Since  $\max_{\mathbf{w} \in \mathcal{B} \cap \mathcal{P}} [\mathbf{w}]_j = [\mathbf{w}]_j^{\max} < 0$  and  $\hat{\mathbf{w}}^* \in \mathcal{B} \cap \mathcal{P}$ , we have

$$[\hat{\mathbf{w}}^*]_j < 0.$$

From Theorem 2, we have  $j \notin \arg \min_{C \subseteq \hat{V}} \hat{F}(C)$ . Note that  $A^* = \mathcal{E} \cup \arg \min \hat{F}(C)$  and  $j \notin \mathcal{E}$ . Therefore  $j \notin A^*$ .

(iii) It is the immediate conclusion from (i) and (ii).

The proof is complete.  $\square$

## F. Proof of Lemma 3

*Proof.* of Lemma 3:

(i) We just need to prove that

$$\begin{cases} [\mathbf{w}]_j^{\min} > 0 & \text{if } [\hat{\mathbf{w}}]_j > \sqrt{2G(\hat{\mathbf{w}}, \hat{\mathbf{s}})}, \\ [\mathbf{w}]_j^{\max} < 0 & \text{if } [\hat{\mathbf{w}}]_j < -\sqrt{2G(\hat{\mathbf{w}}, \hat{\mathbf{s}})}. \end{cases}$$

We divide the proof into two parts. First, when  $[\hat{\mathbf{w}}]_j > \sqrt{2G(\hat{\mathbf{w}}, \hat{\mathbf{s}})}$ , considering the definition of  $[\mathbf{w}]_j^{\min}$ , we have

$$[\mathbf{w}]_j^{\min} = \min_{\mathbf{w} \in \mathcal{B} \cap \mathcal{P}} [\mathbf{w}]_j \geq \min_{\mathbf{w} \in \mathcal{B}} [\mathbf{w}]_j = [\hat{\mathbf{w}}]_j - \sqrt{2G(\hat{\mathbf{w}}, \hat{\mathbf{s}})} > 0.$$

In this case, the element  $j$  can be screened by rule [AES-1](#).

On the other hand, when  $[\hat{\mathbf{w}}]_j < -\sqrt{2G(\hat{\mathbf{w}}, \hat{\mathbf{s}})}$ , from the definition of  $[\mathbf{w}]_j^{\max}$ , we have

$$[\mathbf{w}]_j^{\max} = \max_{\mathbf{w} \in \mathcal{B} \cap \mathcal{P}} [\mathbf{w}]_j \leq \max_{\mathbf{w} \in \mathcal{B}} [\mathbf{w}]_j = [\hat{\mathbf{w}}]_j + \sqrt{2G(\hat{\mathbf{w}}, \hat{\mathbf{s}})} < 0.$$

In this case, the element  $j$  can be screened by rule [IES-1](#).

(ii) We note that the point  $\mathbf{v}$  with  $[\mathbf{v}]_j = 0$  and  $[\mathbf{v}]_k = [\hat{\mathbf{w}}]_k$  for all  $k \neq j, k = 1, 2, \dots, \hat{p}$  belongs to the ball  $\mathcal{B}$ . Thus, we have

$$\min_{\mathbf{w} \in \mathcal{B}, [\mathbf{w}]_j \leq 0} \|\mathbf{w}\|_1 \leq \sum_{i \neq j} |[\hat{\mathbf{v}}]_i| = \|\hat{\mathbf{w}}\|_1 - [\hat{\mathbf{w}}]_j < \|\hat{\mathbf{w}}\|_1.$$

Now, we turn to calculate  $\max_{\mathbf{w} \in \mathcal{B}, [\mathbf{w}]_j \leq 0} \|\mathbf{w}\|_1$ .

We note that the range of  $[\mathbf{w}]_j$  is  $[-\sqrt{2G(\hat{\mathbf{w}}, \hat{\mathbf{s}})} + [\hat{\mathbf{w}}]_j, \sqrt{2G(\hat{\mathbf{w}}, \hat{\mathbf{s}})} + [\hat{\mathbf{w}}]_j]$  when  $\mathbf{w} \in \mathcal{B}$ . Hence, the problem  $\max_{\mathbf{w} \in \mathcal{B}, [\mathbf{w}]_j \leq 0} \|\mathbf{w}\|_1$  can be decomposed into

$$\max_{-\sqrt{2G(\hat{\mathbf{w}}, \hat{\mathbf{s}})} + [\hat{\mathbf{w}}]_j \leq \alpha \leq 0} \left\{ \max_{\mathbf{w} \in \mathcal{B}, [\mathbf{w}]_j = \alpha} \|\mathbf{w}\|_1 \right\}.$$

We assume  $[\mathbf{w}]_j = \alpha$  with  $-\sqrt{2G(\hat{\mathbf{w}}, \hat{\mathbf{s}})} + [\hat{\mathbf{w}}]_j \leq \alpha \leq 0$  and first consider the following problem,

$$\max_{\mathbf{w} \in \mathcal{B}, [\mathbf{w}]_j = \alpha} \|\mathbf{w}\|_1,$$

which can be rewritten as

$$\begin{aligned} & \max_{[\mathbf{w}]_i, i \neq j} -\alpha + \sum_{i \neq j} |[\mathbf{w}]_i| \\ & s.t. \sum_{i \leq \hat{p}, i \neq j} ([\mathbf{w}]_i - [\hat{\mathbf{w}}]_j)^2 \leq 2G(\hat{\mathbf{w}}, \hat{\mathbf{s}}) - (\alpha - [\hat{\mathbf{w}}]_j)^2. \end{aligned}$$

It is easy to check that the optimal solution of the problem above is

$$[\mathbf{w}]_i = [\hat{\mathbf{w}}]_i + \mathbf{sign}([\hat{\mathbf{w}}]_i) \sqrt{\frac{2G(\hat{\mathbf{w}}, \hat{\mathbf{s}}) - (\alpha - [\hat{\mathbf{w}}]_j)^2}{\hat{p} - 1}}.$$

The function  $\mathbf{sign}(\cdot) : \mathbb{R} \rightarrow \{-1, 1\}$  above takes 1 if the argument is positive, otherwise takes -1. And the corresponding optimal value is

$$\max_{\mathbf{w} \in \mathcal{B}, [\mathbf{w}]_j = \alpha} \|\mathbf{w}\|_1 = -\alpha + \sum_{i \neq j} |[\hat{\mathbf{w}}]_i| + \sqrt{\hat{p} - 1} \sqrt{2G(\hat{\mathbf{w}}, \hat{\mathbf{s}}) - (\alpha - [\hat{\mathbf{w}}]_j)^2}.$$

Now, we denote  $h(\alpha) = -\alpha + \sum_{i \neq j} |[\hat{\mathbf{w}}]_i| + \sqrt{\hat{p} - 1} \sqrt{2G(\hat{\mathbf{w}}, \hat{\mathbf{s}}) - (\alpha - [\hat{\mathbf{w}}]_j)^2}$  and turn to solve

$$\max_{-\sqrt{2G(\hat{\mathbf{w}}, \hat{\mathbf{s}})} + [\hat{\mathbf{w}}]_j \leq \alpha \leq 0} h(\alpha)$$

If  $[\hat{\mathbf{w}}]_j - \sqrt{\frac{2G(\hat{\mathbf{w}}, \hat{\mathbf{s}})}{\hat{p}}} < 0$ , then

$$\begin{aligned} \max_{-\sqrt{2G(\hat{\mathbf{w}}, \hat{\mathbf{s}})} + [\hat{\mathbf{w}}]_j \leq \alpha \leq 0} h(\alpha) &= h([\hat{\mathbf{w}}]_j - \sqrt{\frac{2G(\hat{\mathbf{w}}, \hat{\mathbf{s}})}{\hat{p}}}) = -[\hat{\mathbf{w}}]_j + \sum_{i \neq j} |[\hat{\mathbf{w}}]_i| + \sqrt{2\hat{p}G(\hat{\mathbf{w}}, \hat{\mathbf{s}})} \\ &= \|\hat{\mathbf{w}}\|_1 - 2[\hat{\mathbf{w}}]_j + \sqrt{2\hat{p}G(\hat{\mathbf{w}}, \hat{\mathbf{s}})}; \end{aligned}$$

else if  $[\hat{\mathbf{w}}]_j - \sqrt{\frac{2G(\hat{\mathbf{w}}, \hat{\mathbf{s}})}{\hat{p}}} \geq 0$ , then

$$\begin{aligned} \max_{-\sqrt{2G(\hat{\mathbf{w}}, \hat{\mathbf{s}})} + [\hat{\mathbf{w}}]_j \leq \alpha \leq 0} h(\alpha) &= h(0) = \sum_{i \neq j} |[\hat{\mathbf{w}}]_i| + \sqrt{\hat{p} - 1} \sqrt{2G(\hat{\mathbf{w}}, \hat{\mathbf{s}}) - [\hat{\mathbf{w}}]_j^2} \\ &= \|\hat{\mathbf{w}}\|_1 - [\hat{\mathbf{w}}]_j + \sqrt{\hat{p} - 1} \sqrt{2G(\hat{\mathbf{w}}, \hat{\mathbf{s}}) - [\hat{\mathbf{w}}]_j^2}. \end{aligned}$$

In a consequence, we have

$$\max_{\mathbf{w} \in \mathcal{B}, [\mathbf{w}]_j \leq 0} \|\mathbf{w}\|_1 = \begin{cases} \|\hat{\mathbf{w}}\|_1 - 2[\hat{\mathbf{w}}]_j + \sqrt{2\hat{p}G(\hat{\mathbf{w}}, \hat{\mathbf{s}})}, & \text{if } [\hat{\mathbf{w}}]_j - \sqrt{\frac{2G(\hat{\mathbf{w}}, \hat{\mathbf{s}})}{\hat{p}}} < 0 \\ \|\hat{\mathbf{w}}\|_1 - [\hat{\mathbf{w}}]_j + \sqrt{\hat{p} - 1} \sqrt{2G(\hat{\mathbf{w}}, \hat{\mathbf{s}}) - [\hat{\mathbf{w}}]_j^2}, & \text{otherwise.} \end{cases}$$

(iii) Recall that the point  $\mathbf{v}$  with  $[\mathbf{v}]_j = 0$  and  $[\mathbf{v}]_k = [\hat{\mathbf{w}}]_k$  for all  $k \neq j, k = 1, 2, \dots, \hat{p}$  lies in the ball  $\mathcal{B}$ . Thus, we have

$$\min_{\mathbf{w} \in \mathcal{B}, [\mathbf{w}]_j \geq 0} \|\mathbf{w}\|_1 \leq \sum_{i \neq j} |[\hat{\mathbf{w}}]_i| = \|\hat{\mathbf{w}}\|_1 - [\hat{\mathbf{w}}]_j < \|\hat{\mathbf{w}}\|_1.$$

Now, we turn to calculate  $\max_{\mathbf{w} \in \mathcal{B}, [\mathbf{w}]_j \geq 0} \|\mathbf{w}\|_1$ .

We note that the range of  $[\mathbf{w}]_j$  is  $[-\sqrt{2G(\hat{\mathbf{w}}, \hat{\mathbf{s}})} + [\hat{\mathbf{w}}]_j, \sqrt{2G(\hat{\mathbf{w}}, \hat{\mathbf{s}})} + [\hat{\mathbf{w}}]_j]$  when  $\mathbf{w} \in \mathcal{B}$ . Hence, we decompose the problem  $\max_{\mathbf{w} \in \mathcal{B}, [\mathbf{w}]_j \geq 0} \|\mathbf{w}\|_1$  into

$$\max_{0 \leq \alpha \leq \sqrt{2G(\hat{\mathbf{w}}, \hat{\mathbf{s}})} + [\hat{\mathbf{w}}]_j} \left\{ \max_{\mathbf{w} \in \mathcal{B}, [\mathbf{w}]_j = \alpha} \|\mathbf{w}\|_1 \right\}.$$

We assume  $[\hat{\mathbf{w}}]_j = \alpha$  with  $0 \leq \alpha \leq \sqrt{2G(\hat{\mathbf{w}}, \hat{\mathbf{s}})} + [\hat{\mathbf{w}}]_j$  and first solve the following problem:

$$\max_{\mathbf{w} \in \mathcal{B}, [\mathbf{w}]_j = \alpha} \|\mathbf{w}\|_1,$$

which can be rewritten as

$$\begin{aligned} & \max_{[\mathbf{w}]_i, i \neq j} \alpha + \sum_{i \neq j} |[\mathbf{w}]_i| \\ & s.t. \sum_{i \leq \hat{p}, i \neq j} ([\mathbf{w}]_i - [\hat{\mathbf{w}}]_j)^2 \leq 2G(\hat{\mathbf{w}}, \hat{\mathbf{s}}) - (\alpha - [\hat{\mathbf{w}}]_j)^2. \end{aligned}$$

It can be verified that the optimal solution of the problem above is

$$[\mathbf{w}]_i = [\hat{\mathbf{w}}]_i + \text{sign}([\hat{\mathbf{w}}]_i) \sqrt{\frac{2G(\hat{\mathbf{w}}, \hat{\mathbf{s}}) - (\alpha - [\hat{\mathbf{w}}]_j)^2}{\hat{p} - 1}}.$$

The function  $\text{sign}(\cdot) : \mathbb{R} \rightarrow \{-1, 1\}$  above takes 1 if the argument is positive, otherwise takes -1. And the corresponding optimal value is

$$\max_{\mathbf{w} \in \mathcal{B}, [\mathbf{w}]_j = \alpha} \|\mathbf{w}\|_1 = \alpha + \sum_{i \neq j} |[\hat{\mathbf{w}}]_i| + \sqrt{\hat{p} - 1} \sqrt{2G(\hat{\mathbf{w}}, \hat{\mathbf{s}}) - (\alpha - [\hat{\mathbf{w}}]_j)^2}.$$

Now, we denote  $h(\alpha) = \alpha + \sum_{i \neq j} |[\hat{\mathbf{w}}]_i| + \sqrt{\hat{p} - 1} \sqrt{2G(\hat{\mathbf{w}}, \hat{\mathbf{s}}) - (\alpha - [\hat{\mathbf{w}}]_j)^2}$  and turn to solve

$$\max_{0 \leq \alpha \leq \sqrt{2G(\hat{\mathbf{w}}, \hat{\mathbf{s}})} + [\hat{\mathbf{w}}]_j} h(\alpha)$$

If  $[\hat{\mathbf{w}}]_j + \sqrt{\frac{2G(\hat{\mathbf{w}}, \hat{\mathbf{s}})}{\hat{p}}} > 0$ , then

$$\begin{aligned} \max_{0 \leq \alpha \leq \sqrt{2G(\hat{\mathbf{w}}, \hat{\mathbf{s}})} + [\hat{\mathbf{w}}]_j} h(\alpha) &= h([\hat{\mathbf{w}}]_j + \sqrt{\frac{2G(\hat{\mathbf{w}}, \hat{\mathbf{s}})}{\hat{p}}}) = [\hat{\mathbf{w}}]_j + \sum_{i \neq j} |[\hat{\mathbf{w}}]_i| + \sqrt{2\hat{p}G(\hat{\mathbf{w}}, \hat{\mathbf{s}})} \\ &= \|\hat{\mathbf{w}}\|_1 + 2[\hat{\mathbf{w}}]_j + \sqrt{2\hat{p}G(\hat{\mathbf{w}}, \hat{\mathbf{s}})}. \end{aligned}$$

Else if  $[\hat{\mathbf{w}}]_j + \sqrt{\frac{2G(\hat{\mathbf{w}}, \hat{\mathbf{s}})}{\hat{p}}} \leq 0$ , then

$$\begin{aligned} \max_{0 \leq \alpha \leq \sqrt{2G(\hat{\mathbf{w}}, \hat{\mathbf{s}})} + [\hat{\mathbf{w}}]_j} h(\alpha) &= h(0) = \sum_{i \neq j} |[\hat{\mathbf{w}}]_i| + \sqrt{\hat{p} - 1} \sqrt{2G(\hat{\mathbf{w}}, \hat{\mathbf{s}}) - [\hat{\mathbf{w}}]_j^2} \\ &= \|\hat{\mathbf{w}}\|_1 + [\hat{\mathbf{w}}]_j + \sqrt{\hat{p} - 1} \sqrt{2G(\hat{\mathbf{w}}, \hat{\mathbf{s}}) - [\hat{\mathbf{w}}]_j^2}. \end{aligned}$$

Consequently, we have

$$\max_{\mathbf{w} \in \mathcal{B}, [\mathbf{w}]_j \geq 0} \|\mathbf{w}\|_1 = \begin{cases} \|\hat{\mathbf{w}}\|_1 + 2[\hat{\mathbf{w}}]_j + \sqrt{2\hat{p}G(\hat{\mathbf{w}}, \hat{\mathbf{s}})}, & \text{if } [\hat{\mathbf{w}}]_j + \sqrt{\frac{2G(\hat{\mathbf{w}}, \hat{\mathbf{s}})}{\hat{p}}} > 0, \\ \|\hat{\mathbf{w}}\|_1 + [\mathbf{w}]_j + \sqrt{\hat{p}-1} \sqrt{2G(\hat{\mathbf{w}}, \hat{\mathbf{s}}) - [\hat{\mathbf{w}}]_j^2}, & \text{otherwise.} \end{cases}$$

The proof is complete.  $\square$

## G. Proof of Theorem 5

*Proof.* of Theorem 5:

(i): Noting that

$$\begin{cases} 0 < [\hat{\mathbf{w}}]_j \leq \sqrt{2G(\hat{\mathbf{w}}, \hat{\mathbf{s}})}, \\ \max_{\mathbf{w} \in \mathcal{B}, [\mathbf{w}]_j \leq 0} \|\mathbf{w}\|_1 < \hat{F}(\hat{V}) - 2\hat{F}(C), \end{cases}$$

and  $\Omega = \{\mathbf{w} : \hat{F}(\hat{V}) - 2\hat{F}(C) \leq \|\mathbf{w}\|_1 \leq \|\hat{\mathbf{s}}\|_1\}$ , we have

$$\{\mathbf{w}, \mathbf{w} \in \mathcal{B}, [\mathbf{w}]_j \leq 0\} \cap \Omega = \emptyset. \quad (21)$$

Since  $\hat{\mathbf{w}}^* \in \mathcal{B} \cap \Omega$ , from (21) we have  $[\hat{\mathbf{w}}^*]_j > 0$ . Thus, from Theorem 2 we have  $j \in \arg \min \hat{F}(C) \subseteq A^*$ .

(ii): Since

$$\begin{cases} -\sqrt{2G(\hat{\mathbf{w}}, \hat{\mathbf{s}})} \leq [\hat{\mathbf{w}}]_j < 0, \\ \max_{\mathbf{w} \in \mathcal{B}, [\mathbf{w}]_j \geq 0} \|\mathbf{w}\|_1 < \hat{F}(\hat{V}) - 2\hat{F}(C), \end{cases}$$

and  $\Omega = \{\mathbf{w} : \hat{F}(\hat{V}) - 2\hat{F}(C) \leq \|\mathbf{w}\|_1 \leq \|\hat{\mathbf{s}}\|_1\}$ , we have

$$\{\mathbf{w}, \mathbf{w} \in \mathcal{B}, [\mathbf{w}]_j \geq 0\} \cap \Omega = \emptyset. \quad (22)$$

Since  $\hat{\mathbf{w}}^* \in \mathcal{B} \cap \Omega$ , from (22) we have  $[\hat{\mathbf{w}}^*]_j < 0$ .

From Theorem 2, we have  $j \notin \arg \min_{C \subseteq \hat{V}} \hat{F}(C)$ . Noting that  $A^* = \mathcal{E} \cup \arg \min_{C \subseteq \hat{V}} \hat{F}(C)$  and  $j \notin \mathcal{E}$ . Therefore  $j \notin A^*$ .

(iii) It is the immediate conclusion of (i) and (ii).

The proof is complete.  $\square$
